# Supplementary material for: A new preparation strategy via an in situ catalytic process: CeO2@Ag/Ag2Ta4O11catalyst for 4-nitrophenol reduction
Source: Royal Society of Chemistry journal article supplement (doi:10.1039/c6ce01171c), 2016-01-01
Supplement: c6ce01171c1.pdf [file c6ce01171c1.pdf]

## A new preparation strategy via in-situ catalytic process: $\text{CeO}_2@\text{Ag}/\text{Ag}_2\text{Ta}_4\text{O}_{11}$ catalyst toward 4-nitrophenol reduction

Yuhang Wu, Congyan Li, Kaiwen Zhou, Yanhong Zhao, Xiaojing Wang\*

School of Chemistry and Chemical Engineering, Inner Mongolia University, Hohhot, Inner Mongolia,

010021, P. R. China

Corresponding Author. Tel: 0471-4994406; Fax: 0471-4992981;

E-mail: wang\_xiao\_jing@hotmail.com

IS: Fig. S1

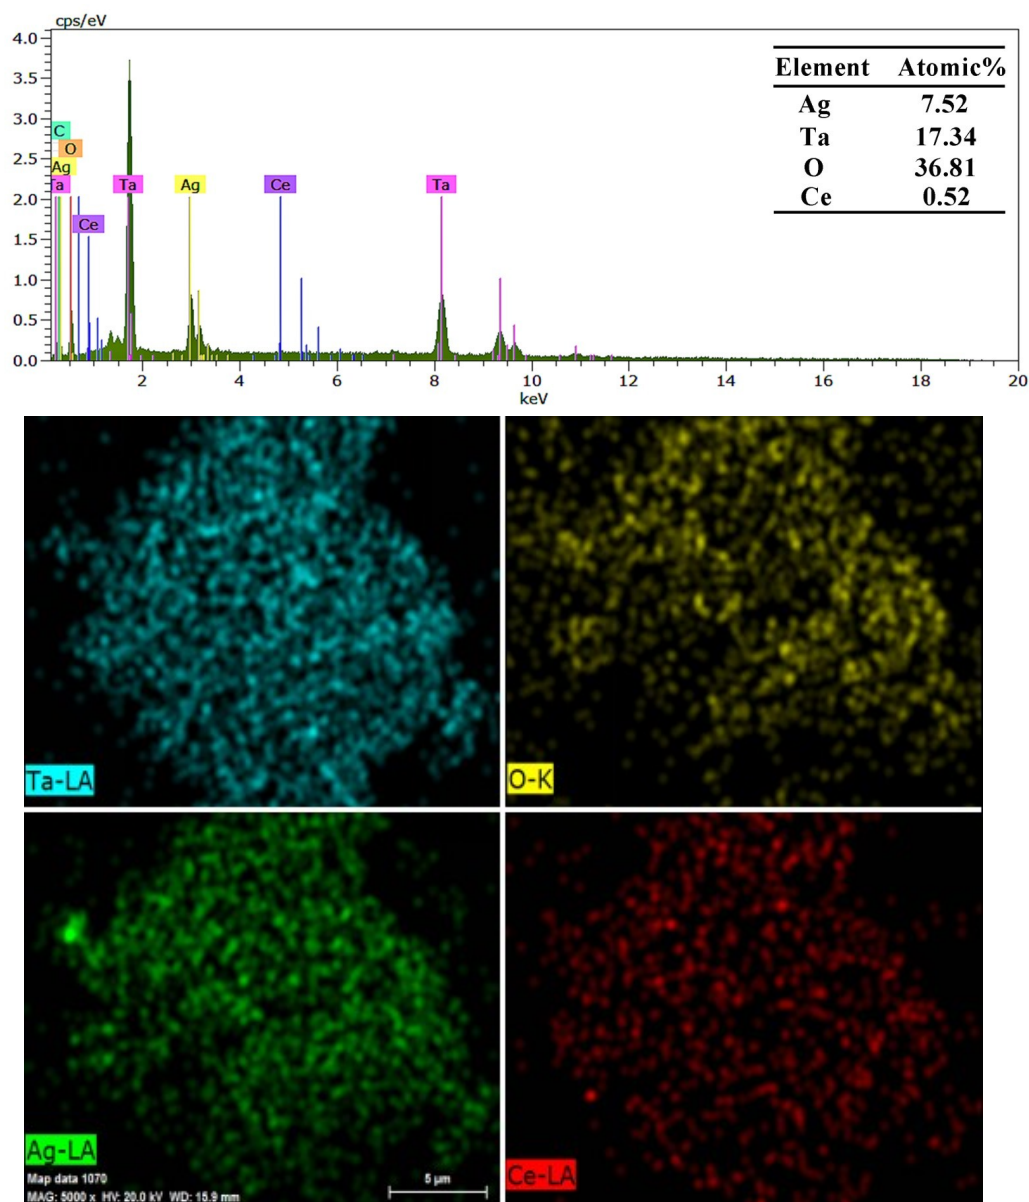

**Figure S1** The energy-dispersive X-ray spectrum and map scanning of  $0.2\text{CeO}_2@\text{Ag}_2\text{Ta}_4\text{O}_{11}$  nanocomposite.

IS: Fig. S2

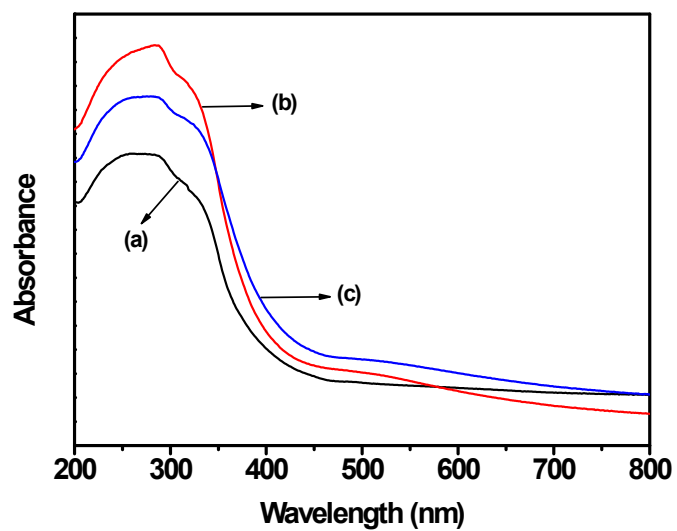

Fig. S2 UV-Vis diffuse reflectance spectra of  $\text{CeO}_2@Ag_2Ta_4O_{11}$  with different molar ratio: (a)  $0.1\text{CeO}_2@Ag_2Ta_4O_{11}$ , (b)  $0.2\text{CeO}_2@Ag_2Ta_4O_{11}$ , (c)  $0.3\text{CeO}_2@Ag_2Ta_4O_{11}$

IS: Fig. S3

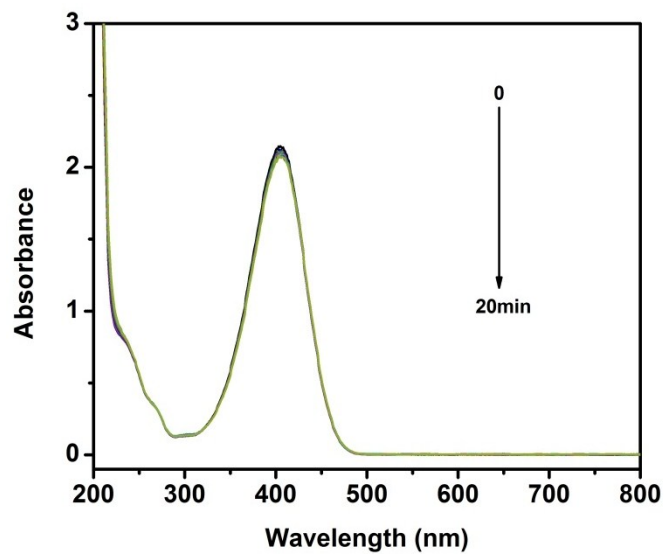

Fig. S3 UV-vis absorption spectra for the catalytic reduction of 4-NP without catalyst

IS: Fig. S4

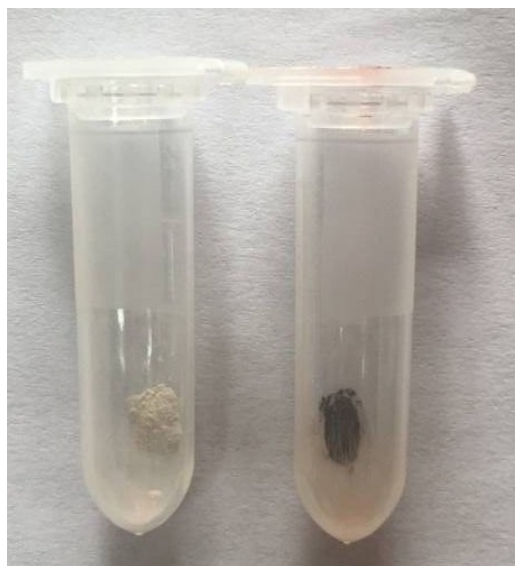

Fig. S4 The colour of the catalysts before and after the reduced reaction

Table. S1 Reaction rate constant of  $\text{CeO}_2@\text{Ag}_2\text{Ta}_4\text{O}_{11}$  nanoparticles together with several catalysts reported in literatures

| Number | Catalysts                                                 | $k_{\text{app}}(\times 10^{-2})$<br>$\text{min}^{-1}$ | Activity factor<br>( $\text{k}/\text{min}^{-1} \cdot \text{mg}^{-1}$ of<br>active metal) | Literature |
|--------|-----------------------------------------------------------|-------------------------------------------------------|------------------------------------------------------------------------------------------|------------|
| 1      | $0.1\text{CeO}_2@\text{Ag}_2\text{Ta}_4\text{O}_{11}$     | 64.996                                                | 129.99                                                                                   | This work  |
| 2      | $0.2\text{CeO}_2@\text{Ag}_2\text{Ta}_4\text{O}_{11}$     | 143.768                                               | 287.54                                                                                   | This work  |
| 3      | $0.3\text{CeO}_2@\text{Ag}_2\text{Ta}_4\text{O}_{11}$     | 306.866                                               | 613.73                                                                                   | This work  |
| 4      | Ag NPs@PGMA-SH composite                                  | $23.64 \pm 1.98$                                      | $47.28 \pm 3.96$                                                                         | 1          |
| 5      | graphene oxide/Ag NPs- $\text{Fe}_3\text{O}_4$            | 160.2                                                 | 320.4                                                                                    | 2          |
| 6      | Ag/ $\text{SiO}_2$ 1.08                                   | 16.38                                                 | 32.76                                                                                    | 3          |
| 7      | Ag NPs on nanostructured silica                           | 6.48                                                  | 12.96                                                                                    | 4          |
| 8      | Ag NPs on $\text{Fe}_3\text{O}_4@\text{C}$ nanocomposites | 102                                                   | 204                                                                                      | 5          |
| 9      | micron- $\text{SiO}_2@\text{Ag}$ NPs                      | 21.36                                                 | 42.72                                                                                    | 6          |
| 10     | Ag/ $\text{TiO}_2$ nanoparticles                          | 194.85                                                | 389.7                                                                                    | 7          |

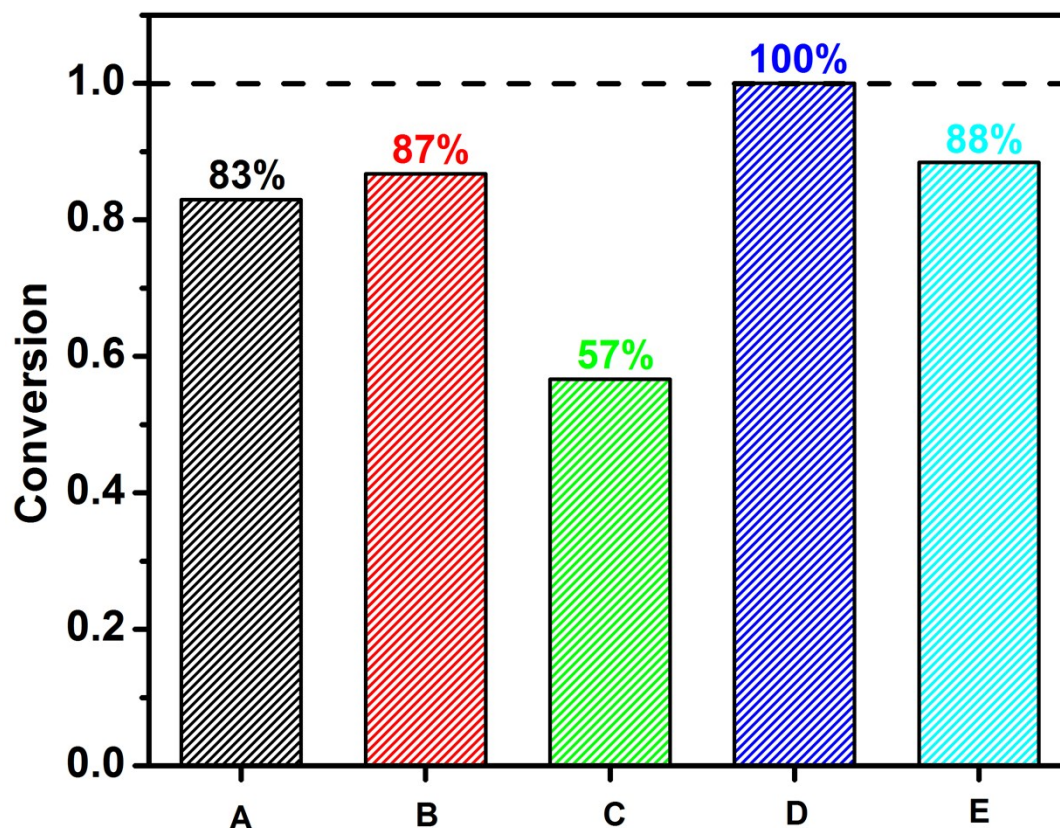

**Fig. S5** profile of conversion efficiency vs time during the catalytic reduction of (A) 4-chloronitrobenzene, (B) 4-nitrobenzoic acid, (C) p-nitrotoluene, (D) nitrobenzene and (E) 4-nitrophenol over  $0.2\text{CeO}_2@\text{Ag}_2\text{Ta}_4\text{O}_{11}$  in a reactive time of 3 min.

- [1] W. C. Zhang, Y. Sun, L. Zhang, In Situ Synthesis of Monodisperse Silver Nanoparticles on Sulfhydryl Functionalized Poly(glycidyl methacrylate) Microspheres for Catalytic Reduction of 4-Nitrophenol [J], *Industrial & Engineering Chemistry Research* 2015, 54, 6480–6488.
- [2] J. C. Qu, C. L. Ren, Y. L. Dong, Y. P. Chang, M. Zhou, X. G. Chen, Facile Synthesis of Multifunctional Graphene Oxide/AgNPs-Fe<sub>3</sub>O<sub>4</sub> Nanocomposite: A Highly Integrated Catalysts. [J], *Chemical Engineering Journal* 2012, 412, 211–212.
- [3] M. Horecha, E. Kaul, A. Horechyy, M. Stamm, Polymer Microcapsules Loaded with Ag Nanocatalyst as Active Microreactors [J], *Journal of Materials Chemistry A* 2014, 2, 7431.
- [4] S. K. Das, M. M. R. Khan, A. K. Guha, N. Naskar, Bio-Inspired Fabrication of Silver Nanoparticles on Nanostructured Silica: Characterization and Application as a Highly Efficient Hydrogenation Catalyst [J], *Green Chemistry* 2013, 15, 2548.
- [5] M. Zhu, C. Wang, D. Meng, G. Diao, In Situ Synthesis of Silver Nanostructures on Magnetic Fe<sub>3</sub>O<sub>4</sub>@C Core–Shell Nanocomposites and Their Application in Catalytic Reduction Reactions [J], *Journal of Materials Chemistry A* 2013, 1, 2118.
- [6] M. Wang, D. Tian, P. Tian, L. Yuan, Synthesis of Micron SiO<sub>2</sub>@Nano-Ag Particles and Their Catalytic Performance in 4-Nitrophenol Reduction [J], *Applied Surface Science* 2013, 283, 389.
- [7] S.P. Deshmukh, R.K. Dhokale, H.M. Yadav, S.N. Achary, S.D. Delekar, Titania-supported silver nanoparticles: An efficient and reusable catalyst for reduction of 4-nitrophenol [J], *Applied Surface Science* 2013, 273, 676-683.
